# Supplementary material
Source: publisher figshare collection journal article supplement (https://gsajournals.figshare.com/articles/dataset/_/6071567)
Supplement: Supplementary file 1 [file 1]

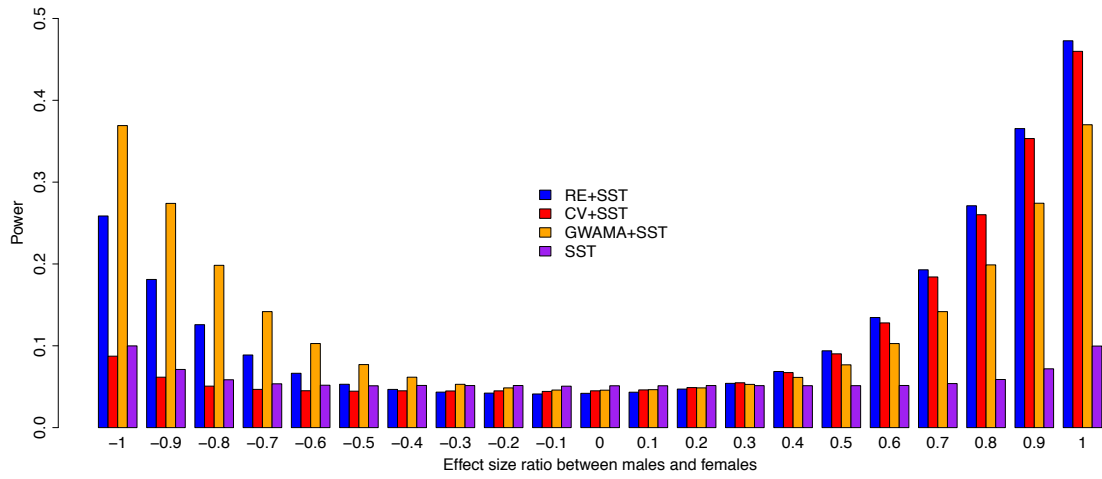

**Figure S1.** Power comparison for the MetaSex(RE+SST), CV+SST, GWAMA+SST, and SST approaches where we varied the effect size ratios of females and males as well as the directions. All methods were corrected for multiple testing.
