# Supplementary material
Source: publisher figshare collection journal article supplement (https://gsajournals.figshare.com/articles/dataset/_/6071567)
Supplement: Supplementary file 2 [file 1]

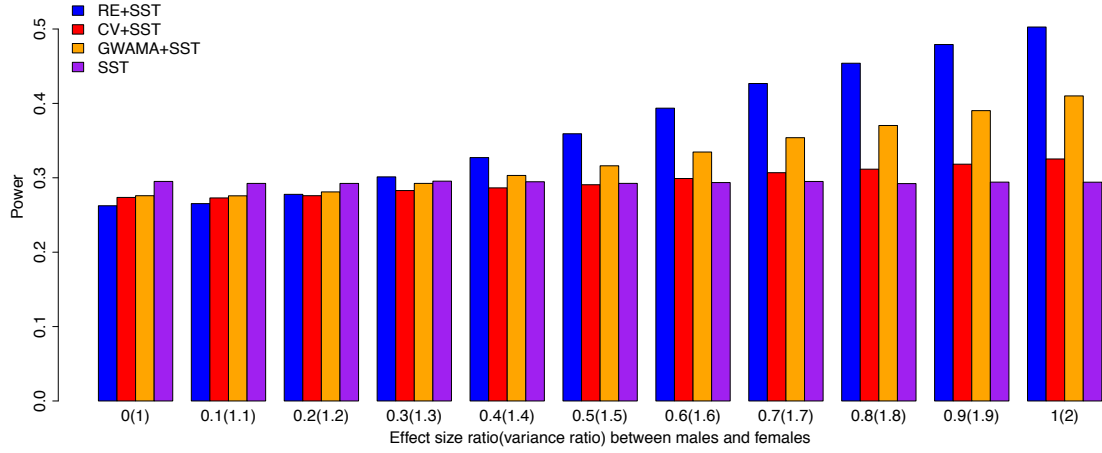

**Figure S2.** Power comparison for the MetaSex(RE+SST), CV+SST, GWAMA+SST, and SST approaches where we simultaneously varied effect size ratios and variance ratios between females and males. We fixed the male effect size and variance as 0.4 and 1.0, and then varied the female effect size and variance.
