# Supplementary material
Source: publisher figshare collection journal article supplement (https://gsajournals.figshare.com/articles/dataset/_/6071567)
Supplement: Supplementary file 3 [file 1]

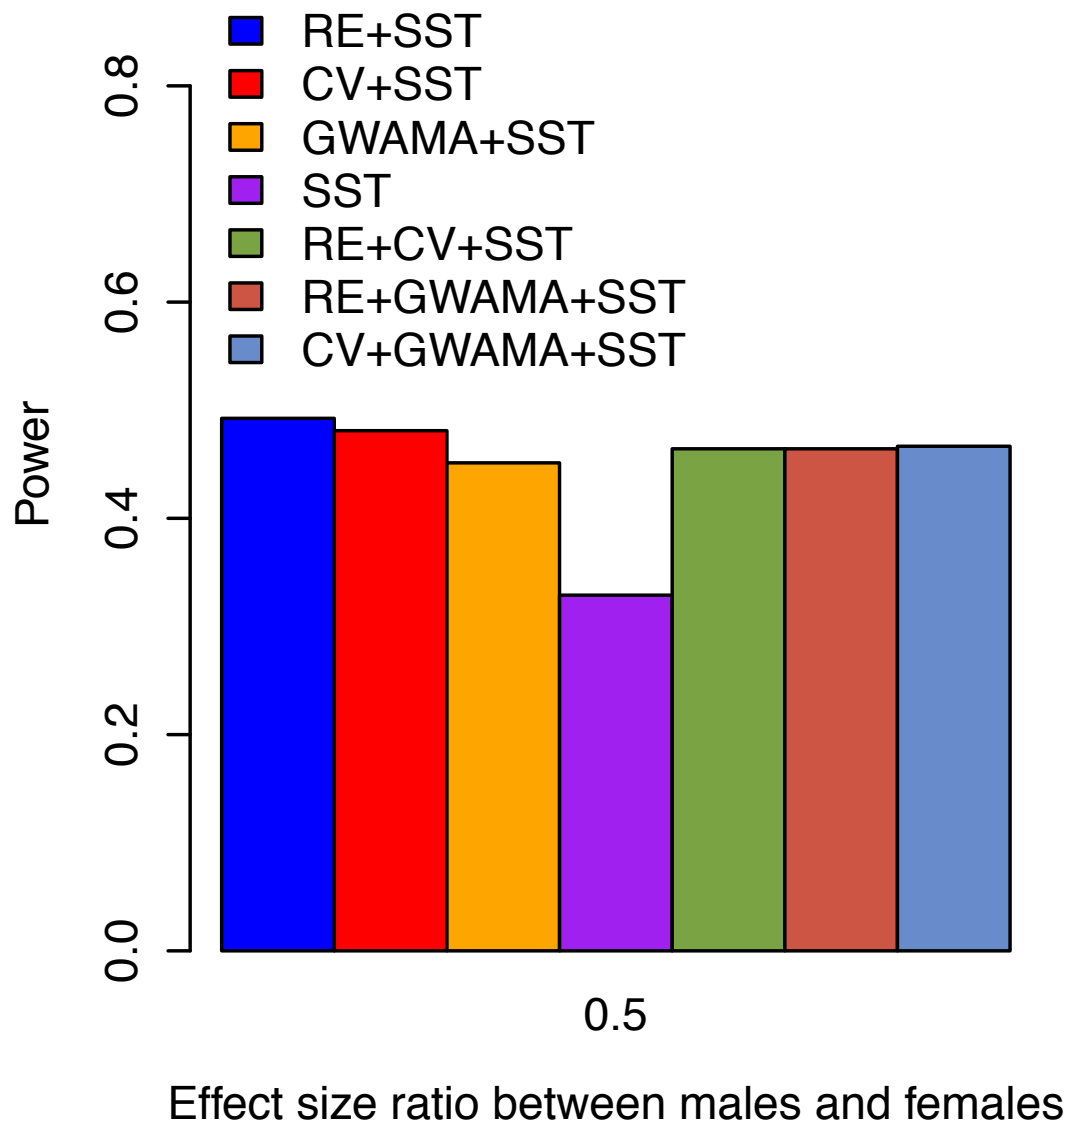

**Figure S3.** Power comparison for different methods including three-method combinations. We fixed the male effect size as 0.25 and females effect size as 0.125. We applied Bonferroni correction to three-method combinations.
