# Supplementary material
Source: publisher figshare collection journal article supplement (https://gsajournals.figshare.com/articles/dataset/_/6071567)
Supplement: Supplementary file 4 [file 1]

| Phenotype                | SST(F) | SST(M) | RE    | CV    | GWAMA |
|--------------------------|--------|--------|-------|-------|-------|
| Triglyceride             | 1.007  | 0.991  | 0.995 | 1.001 | 1.006 |
| HDL                      | 1.002  | 0.995  | 1.008 | 1.003 | 0.993 |
| LDL                      | 1.001  | 0.996  | 1.011 | 1.002 | 1.004 |
| BMI                      | 0.999  | 0.996  | 0.992 | 0.994 | 0.994 |
| C-reactive protein       | 0.994  | 0.989  | 0.998 | 0.993 | 0.994 |
| Glucose                  | 1.006  | 1.000  | 1.011 | 1.008 | 1.006 |
| Insulin                  | 1.004  | 0.996  | 1.006 | 1.005 | 1.001 |
| Systolic blood pressure  | 0.997  | 0.997  | 1.012 | 1.006 | 1.000 |
| Diastolic blood pressure | 0.998  | 1.008  | 1.013 | 1.006 | 1.002 |
| Height                   | 1.004  | 1.002  | 1.028 | 1.003 | 1.001 |

**Table S2.** Genomic control factors of the method in the genome-wide association mapping of the 10 phenotypes of NFBC data.
