# Supplementary material
Source: publisher figshare collection journal article supplement (https://gsajournals.figshare.com/articles/dataset/_/6071567)
Supplement: Supplementary file 5 [file 1]

| Phenotype                | $\sigma_d^2(SE)$ | $\sigma_{a,f}^2(SE)$ | $\sigma_{a,m}^2(SE)$ | $\sigma_{e,ss}^2(SE)$ | $\sigma_e^2(SE)$ | $P_g$                     | $P_{g,f}$          | $P_{g,m}$          | $P_{ss}$                 |
|--------------------------|------------------|----------------------|----------------------|-----------------------|------------------|---------------------------|--------------------|--------------------|--------------------------|
| Triglyceride             | 0.0189(0.014)    | 0.0323(0.0219)       | 0.0031(0.0236)       | 0.1134(0.0283)        | 0.1205(0.0189)   | 1.79 <sup>-1</sup>        | 1.4 <sup>-1</sup>  | 8.95 <sup>-1</sup> | <b>6.23<sup>-5</sup></b> |
| HDL                      | 0.0375(0.0072)   | 0(0.011)             | 0(0.0117)            | 0.0017(0.0137)        | 0.0694(0.0103)   | <b>1.72<sup>-7</sup></b>  | 1.00               | 1.00               | 8.99 <sup>-1</sup>       |
| LDL                      | 0.2569(0.0511)   | 0.0237(0.0786)       | 0.042(0.082)         | 0.1186(0.0983)        | 0.3921(0.067)    | <b>4.88<sup>-7</sup></b>  | 7.63 <sup>-1</sup> | 6.08 <sup>-1</sup> | 2.27 <sup>-1</sup>       |
| BMI                      | 0.0052(0.0014)   | 0(0.0022)            | 0(0.0023)            | 0.0107(0.0028)        | 0.0118(0.002)    | <b>2.53<sup>-4</sup></b>  | 1.00               | 1.00               | <b>1.20<sup>-4</sup></b> |
| C-reactive protein       | 0.222(0.1553)    | 0.1346(0.243)        | 0.0301(0.2641)       | 0.0227(0.3108)        | 1.9925(0.2321)   | 1.53 <sup>-1</sup>        | 5.80 <sup>-1</sup> | 9.09 <sup>-1</sup> | 9.42 <sup>-1</sup>       |
| Glucose                  | 0.0011(0.0006)   | 0.0002(0.0008)       | 0.0014(0.0008)       | 0.0009(0.0009)        | 0.0043(0.0007)   | 2.31 <sup>-2</sup>        | 7.83 <sup>-1</sup> | 8.66 <sup>-2</sup> | 3.56 <sup>-1</sup>       |
| Insulin                  | 0.0121(0.0082)   | 0.0139(0.0132)       | 0.004(0.0142)        | 0.0163(0.0167)        | 0.0847(0.0113)   | 1.40 <sup>-1</sup>        | 2.93 <sup>-1</sup> | 7.79 <sup>-1</sup> | 3.30 <sup>-1</sup>       |
| Systolic blood pressure  | 37.1421(10.5002) | 4.5774(16.7722)      | 1.9977(17.5993)      | 18.3323(21.4657)      | 114.189(14.6194) | <b>4.04<sup>-4</sup></b>  | 7.85 <sup>-1</sup> | 9.10 <sup>-1</sup> | 3.93 <sup>-1</sup>       |
| Diastolic blood pressure | 22.0399(8.3115)  | 0.0001(12.9059)      | 0.0001(13.6516)      | 11.6098(16.1558)      | 97.5402(11.0647) | 8.01 <sup>-3</sup>        | 1.00               | 1.00               | 4.72 <sup>-1</sup>       |
| Height                   | 24.0673(2.6501)  | 1.2284(3.8886)       | 1.1577(4.2184)       | 3.2263(4.9783)        | 12.6085(3.326)   | <b>1.07<sup>-19</sup></b> | 7.52 <sup>-1</sup> | 7.84 <sup>-1</sup> | 5.17 <sup>-1</sup>       |

**Table S1.** P-values of the variance components in the full five-variance-component model for the 10 phenotypes of NFBC data. For each trait, we tested if the variance of the polygenic background effect term( $\sigma_g^2$ ) was significantly non-zero ( $P_g$ ) and if the variance of sex-specific error term( $\sigma_{e,ss}^2$ ) was significantly non-zero ( $P_{ss}$ ). We used bold font for p-values less than 0.005 (corrected for 10 phenotypes).
