# Supplementary material
Source: publisher figshare collection journal article supplement (https://gsajournals.figshare.com/articles/dataset/_/6071567)
Supplement: Supplementary file 6 [file 1]

| Phenotype : C-reactive protein |                 |                 |          | sex-specific |                 | beta±std error |              | best      |
|--------------------------------|-----------------|-----------------|----------|--------------|-----------------|----------------|--------------|-----------|
| rsid                           | RE              | CV              | GWAMA    | SST(F)       | SST(M)          | female         | male         | methods   |
| rs2794520                      | 3.32e-23        | <b>2.11e-23</b> | 1.64e-22 | 1.28e-13     | 2.93e-11        | 0.314±0.042    | 0.291±0.043  | RE,CV     |
| rs2650000                      | <b>1.71e-12</b> | 1.64e-12        | 8.09e-12 | 2.79e-06     | 8.65e-08        | 0.199±0.042    | 0.220±0.041  | RE,CV     |
| Phenotype : Glucose            |                 |                 |          | sex-specific |                 | beta±std error |              | best      |
| rsid                           | RE              | CV              | GWAMA    | SST(F)       | SST(M)          | female         | male         | methods   |
| rs560887                       | 5.30e-12        | <b>1.14e-12</b> | 1.39e-09 | 8.19e-06     | 4.83e-08        | 0.011±0.002    | 0.014±0.002  | CV        |
| rs7298683                      | 2.01e-07        | 8.14e-05        | 7.23e-08 | 0.86718      | <b>5.92e-09</b> | -0.0007±0.004  | 0.026±0.004  | SST(M)    |
| Phenotype : HDL                |                 |                 |          | sex-specific |                 | beta±std error |              | best      |
| rsid                           | RE              | CV              | GWAMA    | SST(F)       | SST(M)          | female         | male         | methods   |
| rs2167079                      | <b>4.46e-08</b> | 1.26e-06        | 5.06e-08 | 0.01838      | 9.78e-08        | -0.024±0.010   | -0.055±0.010 | RE, GWAMA |
| rs7120118                      | <b>4.62e-08</b> | 1.13e-06        | 5.07e-08 | 0.01679      | 1.15e-07        | -0.024±0.010   | -0.054±0.010 | RE, GWAMA |
| rs1532085                      | <b>3.53e-12</b> | 1.08e-11        | 2.98e-11 | 1.87e-06     | 2.25e-07        | -0.048±0.010   | -0.050±0.009 | RE        |
| rs3764261                      | <b>4.15e-32</b> | 4.89e-32        | 2.88e-31 | 8.85e-16     | 3.63e-18        | -0.090±0.011   | -0.092±0.010 | RE,CV     |
| rs255049                       | <b>5.26e-09</b> | 1.45e-08        | 3.94e-08 | 0.00014      | 5.85e-06        | -0.047±0.012   | -0.053±0.011 | RE        |
| rs1800961                      | <b>2.39e-08</b> | 2.82e-08        | 8.96e-08 | 0.00051      | 6.29e-06        | 0.083±0.023    | 0.108±0.023  | RE,CV     |
| Phenotype : LDL                |                 |                 |          | sex-specific |                 | beta±std error |              | best      |
| rsid                           | RE              | CV              | GWAMA    | SST(F)       | SST(M)          | female         | male         | methods   |
| rs646776                       | <b>1.97e-15</b> | 4.17e-15        | 9.71e-15 | 8.36e-10     | 2.11e-07        | 0.169±0.027    | 0.166±0.031  | RE        |
| rs693                          | <b>1.25e-11</b> | 2.97e-11        | 5.84e-11 | 8.81e-09     | 0.00013         | -0.131±0.022   | -0.103±0.026 | RE        |
| rs11668477                     | 1.98e-08        | <b>4.04e-09</b> | 1.96e-08 | 0.00240      | 2.62e-07        | 0.090±0.029    | 0.179±0.034  | CV        |
| Phenotype : Triglyceride       |                 |                 |          | sex-specific |                 | beta±std error |              | best      |
| rsid                           | RE              | CV              | GWAMA    | SST(F)       | SST(M)          | female         | male         | methods   |
| rs673548                       | <b>2.61e-08</b> | 6.54e-08        | 2.21e-07 | 6.11e-06     | 0.00097         | 0.058±0.012    | 0.054±0.016  | RE        |
| rs1260326                      | <b>1.64e-10</b> | 1.88e-10        | 1.49e-09 | 1.32e-06     | 2.10e-05        | -0.057±0.011   | -0.065±0.015 | RE,CV     |
| rs10096633                     | 5.32e-08        | <b>1.98e-08</b> | 1.19e-07 | 0.00109      | 3.47e-06        | 0.062±0.019    | 0.113±0.024  | CV        |

**Table S3.** Association mapping results of the NFBC data. We present 16 SNPs for which any method gave  $P < 5 \times 10^{-8}$  in any of 10 phenotypes. For each SNP, the most significant p-value among the four methods (RE, CV, GWAMA, and SST) is in bold font. The “beta” column shows the effect sizes of male- and female-only studies and their estimated standard errors. For each significant association, we report the “best methods”, the set of methods whose p-value was less than two times the most significant p-value for each association.
